# Supplementary material for: Morphological evolution of carbonated hydroxyapatite to faceted nanorods through intermediate states
Source: Royal Society of Chemistry journal article supplement (doi:10.1039/d1ce00231g), 2021-01-01
Supplement: d1ce00231g1.pdf [file d1ce00231g1.pdf]

## Supporting Information

### Morphological evolution of carbonated hydroxyapatite to faceted nanorods through intermediate states

Yuki Hagiwara, Mihiro Takasaki, Yuya Oaki, and Hiroaki Imai\*

Department of Applied Chemistry, Faculty of Science and Technology, Keio University, 3-14-1 Hiyoshi, Kohoku-ku, Yokohama 223-8522, Japan. E-mail\*: [hiroaki@applc.keio.ac.jp](mailto:hiroaki@applc.keio.ac.jp)

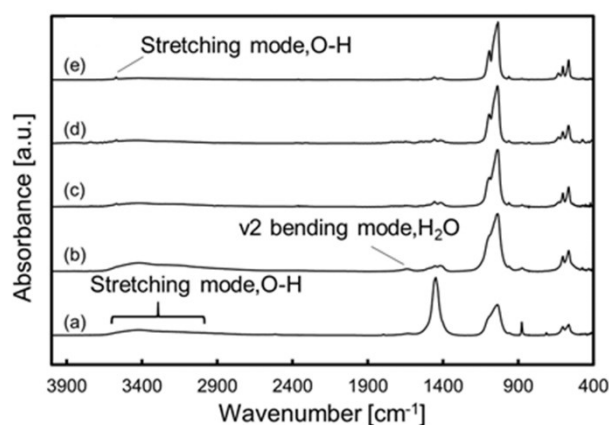

**Fig. S1** FTIR spectra of the products from calcite. Reaction time: 0.2 h (a), 0.5 h (b), 2 h (c), 6 h (d), and 24 h (e). Broad signals from 3000 to 3700  $\text{cm}^{-1}$  and around 1600  $\text{cm}^{-1}$  are assigned to stretching and bending vibrations of  $\text{H}_2\text{O}$  that were adsorbed on the surface of HA nanosheets.

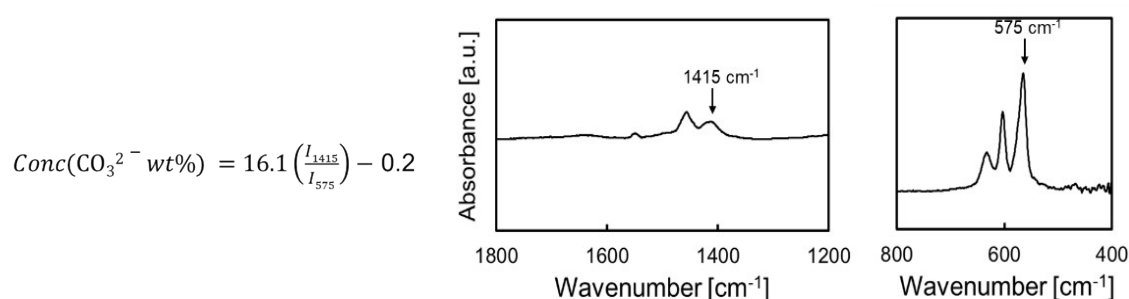

**Fig. S2** Estimation of the concentration of  $\text{CO}_3^{2-}$  based on the FTIR signal intensity of  $\text{CO}_3^{2-}$  (1415  $\text{cm}^{-1}$ ) and  $\text{PO}_4^{3-}$  (575  $\text{cm}^{-1}$ ).

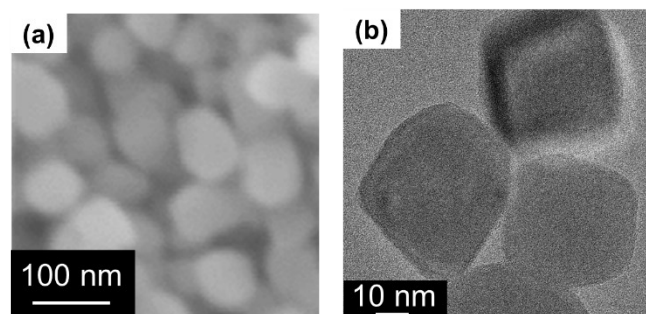

**Fig. S3** SEM (a) and TEM (b) images of the original calcite nanoparticles.

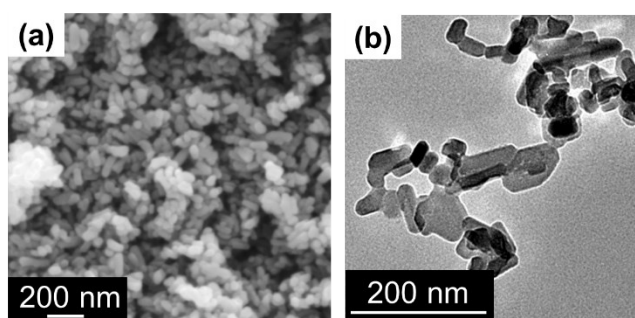

**Fig. S4** SEM (a) and TEM (b) images of the products from calcite after the reaction for 6 h.

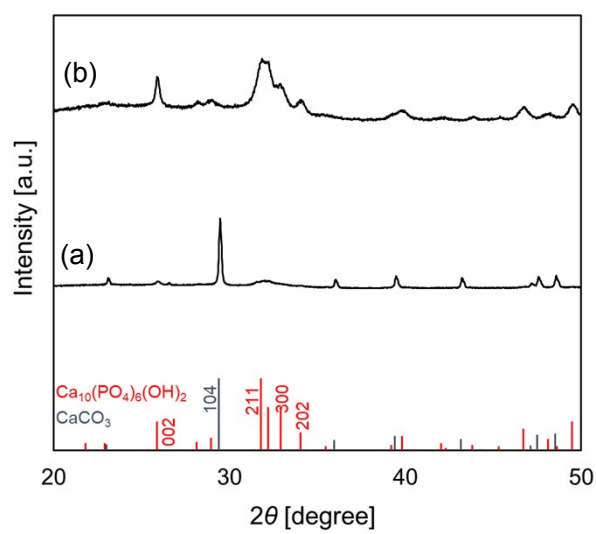

**Fig. S5** XRD patterns of the products from calcite after the reaction at 60 °C for 0.5 h (a) and 6 h (b).

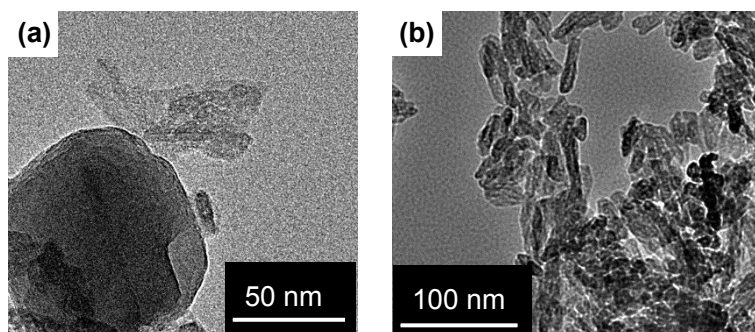

**Fig. S6** TEM images of the products from calcite after the reaction at 60 °C for 0.5 h (a) and 6 h (b).

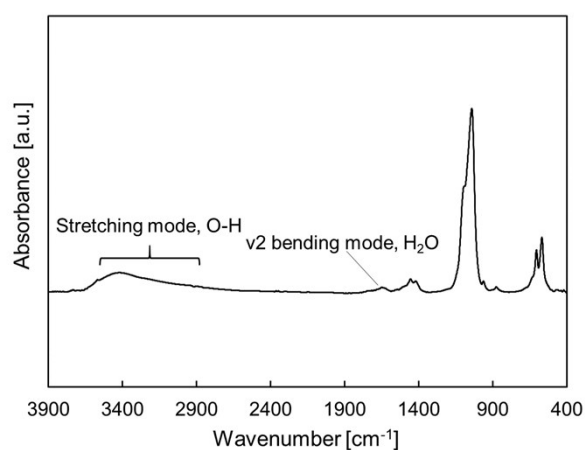

**Fig. S7** FTIR spectra of the products from ion precursors after hydrothermal treatment for 0.5 h. Broad signals from 3000 to 3700  $\text{cm}^{-1}$  and around 1600  $\text{cm}^{-1}$  are assigned to stretching and bending vibrations of  $\text{H}_2\text{O}$  that were adsorbed on the surface of HA nanosheets.
